# Supplementary material
Source: PubMed Central journal article supplement (PMC4084873)
Supplement: NIHMS473966-supplement-Supp_Figure_S1-S3.pdf [file NIHMS473966-supplement-Supp_Figure_S1-S3.pdf]

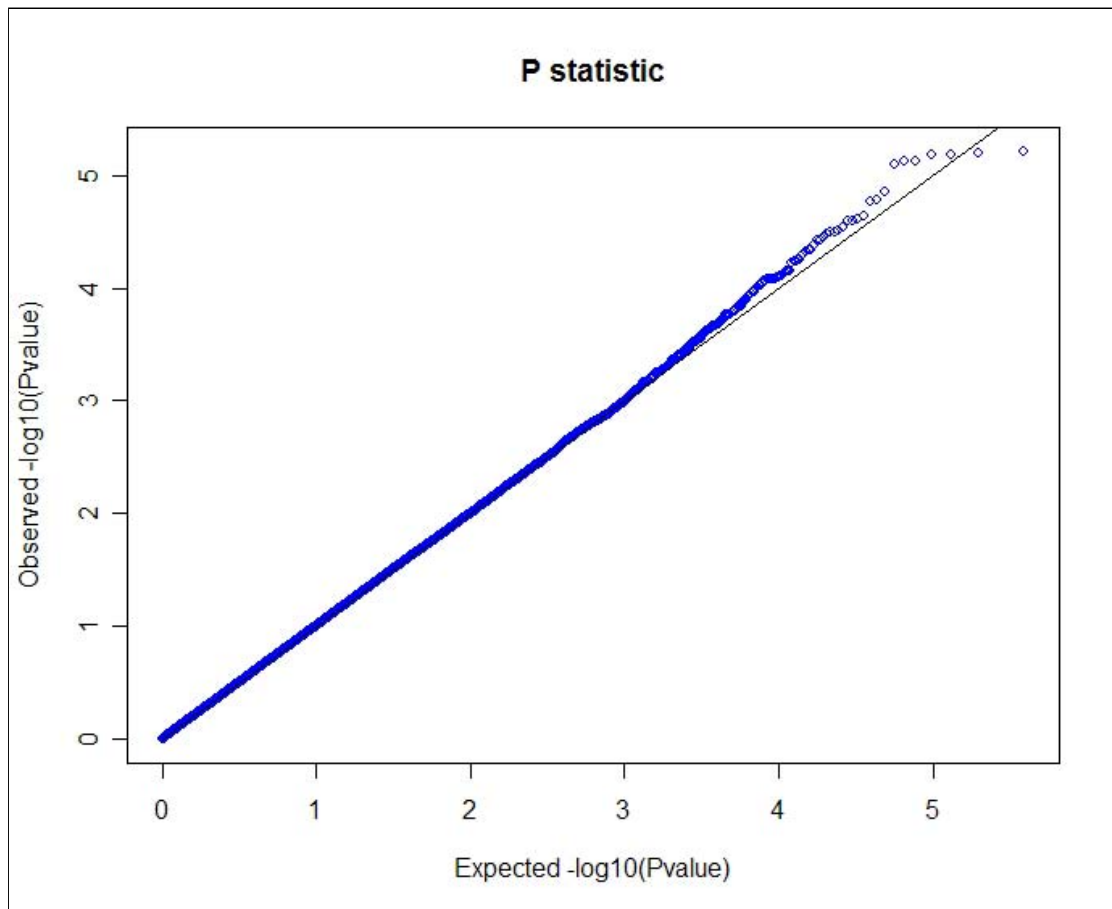

**Supplemental Figure 1: Observed vs. expected  $-\log_{10}(\text{P-value})$ s across the genome for the  $p$  statistic.**

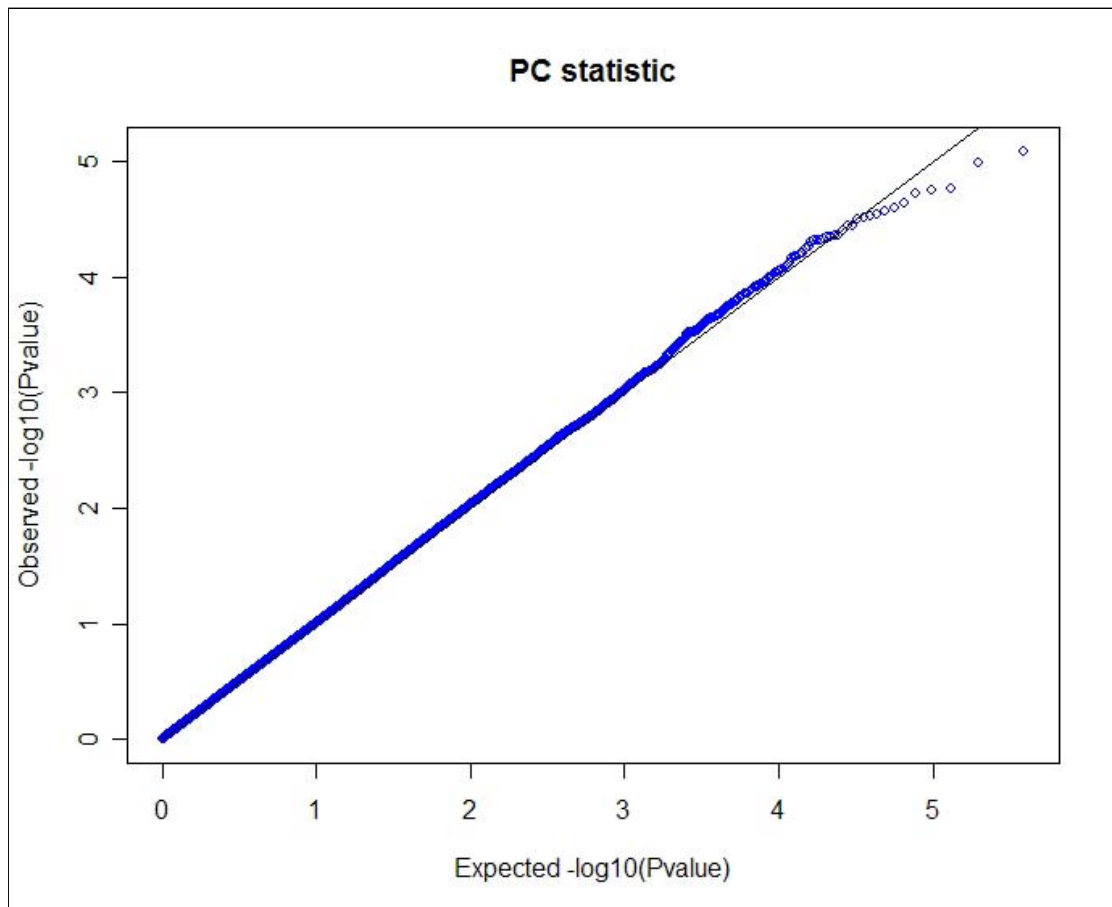

**Supplemental Figure 2: Observed vs. expected  $-\log_{10}(\text{P-value})$ s across the genome for the  $pc$  statistic.**

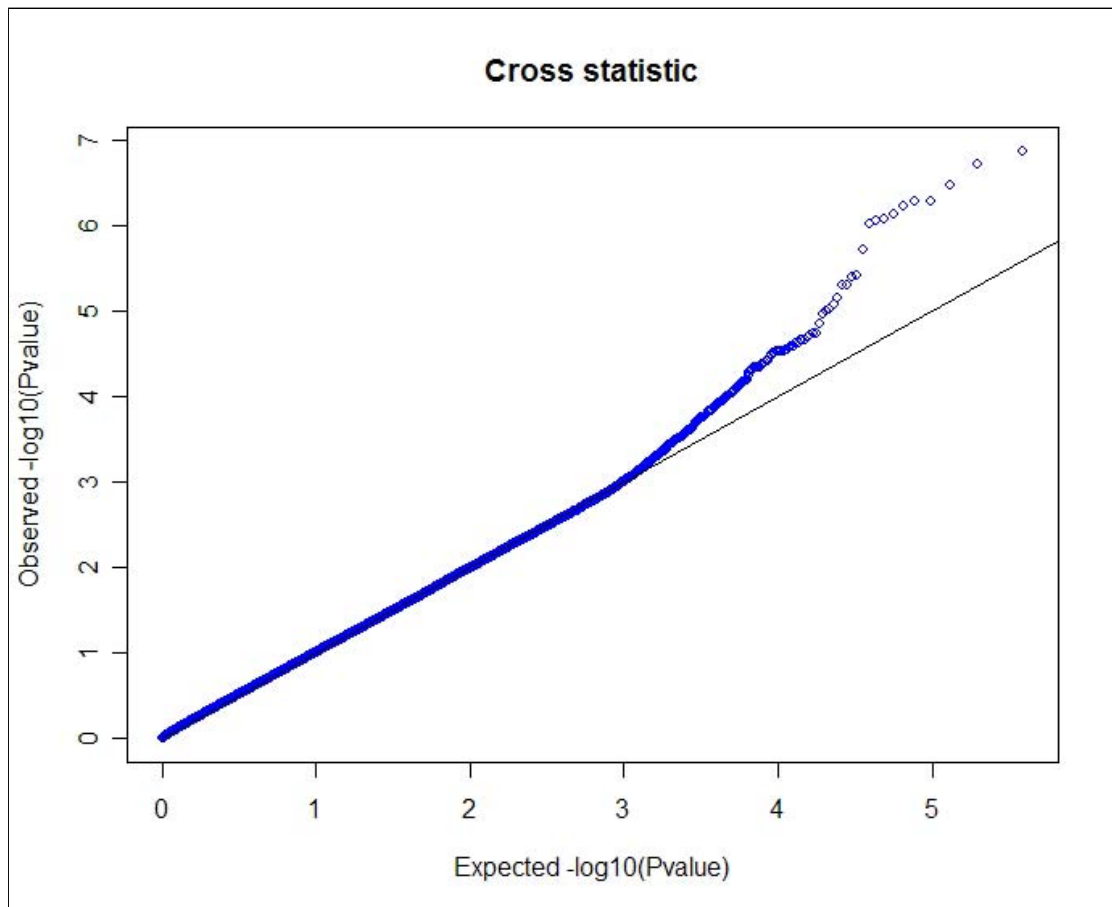

**Supplemental Figure 3: Observed vs. expected  $-\log_{10}(\text{P-value})$ s across the genome for the *cross* statistic.**
